# Supplementary material for: Paromomycin Reduces Vairimorpha (Nosema) ceranae Infection in Honey Bees but Perturbs Microbiome Levels and Midgut Cell Function
Source: MDPI journal article supplement (doi:10.3390/microorganisms10061107), 2022-05-27
Supplement: s1 [file s1]

## Supplemental Figure Legends

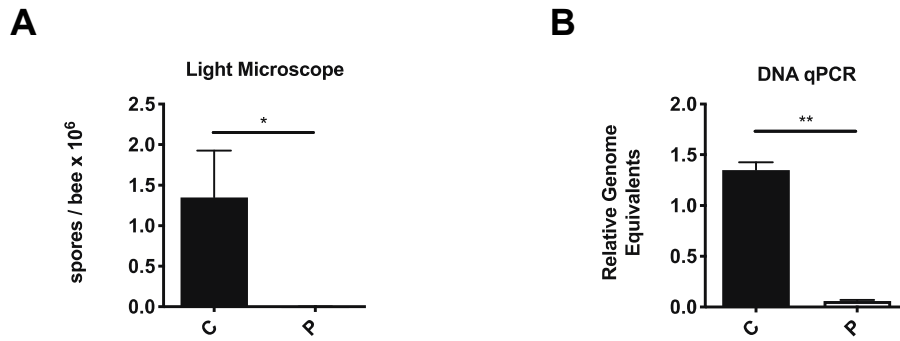

**Figure S1. Paromomycin treatment reduces *V. ceranae* infection level in colony bees.**

*V. ceranae* levels in midguts of infected landing board bees fed sucrose syrup containing various doses of Paromomycin for 4 days as determined by spore count using light microscopy (A) or by qPCR (B). Statistical significance is noted as \* for  $p < 0.05$  and \*\* for  $p < 0.01$ .

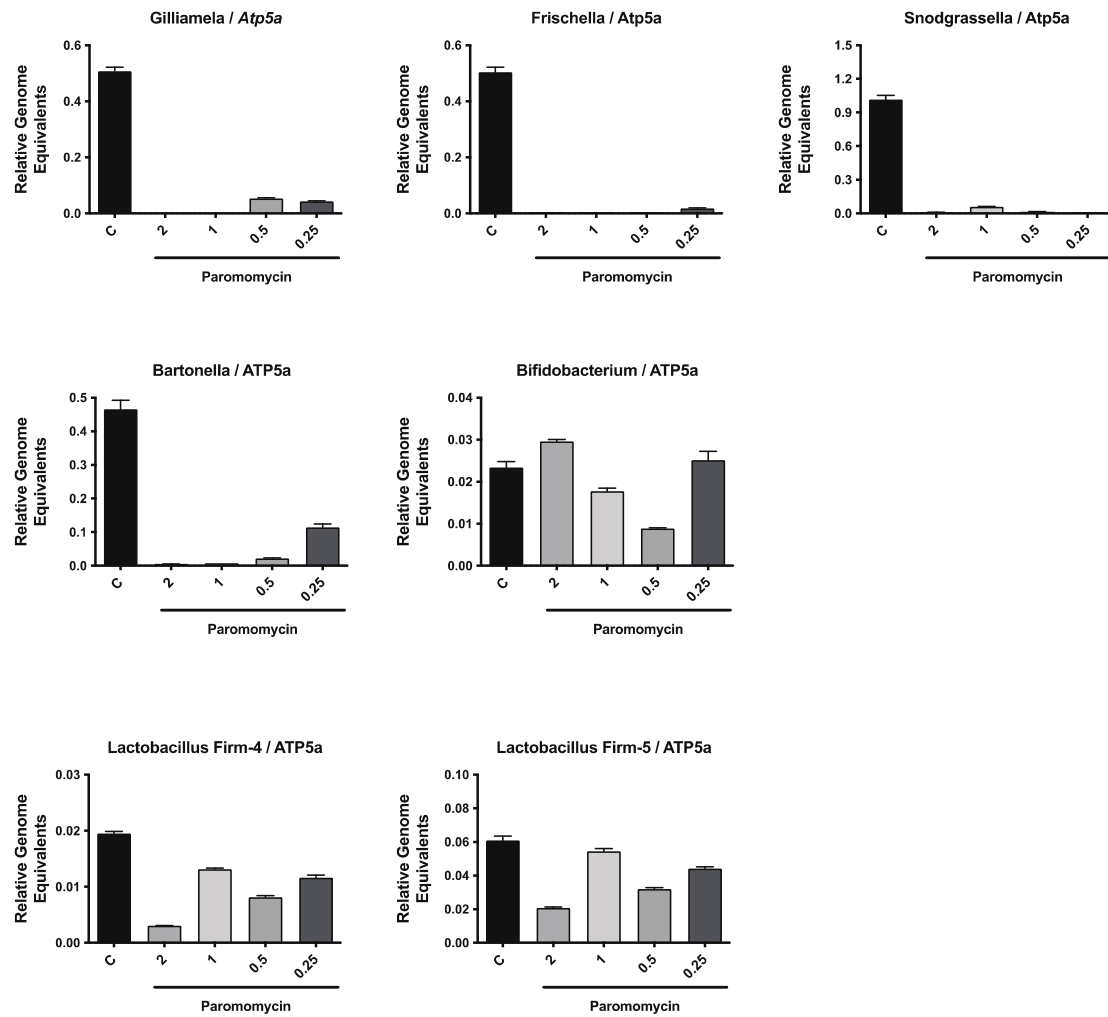

**Figure S2. Paromomycin alters relative abundance of bacterial microbiome community members.**

Levels of the major species of bacterial microbiome community members (*Gilliamella apicola*, *Frischella perrara*, *Snodgrassella alvi*, *Bartonella apis*, *Bifidobacterium asteroides*, *Lactobacillus Firm-4*, and *Lactobacillus Firm-5*) as determined by qPCR in midguts of infected newly eclosed bees fed sucrose syrup containing various doses of paromomycin for 4 days.
